# Supplementary material for: Field Level RNAi-Mediated Resistance to Cassava Brown Streak Disease across Multiple Cropping Cycles and Diverse East African Agro-Ecological Locations
Source: Front Plant Sci. 2017 Jan 12;7:2060. doi: 10.3389/fpls.2016.02060 (PMC5226948; doi:10.3389/fpls.2016.02060)
Supplement: Supplementary file 2 [file Table2.xlsx]

## Sheet: Sheet1
Field level RNAi-mediated resistance to Cassava brown streak disease across multiple cropping cycles and diverse East African agro-ecological locations
Henry Wagaba, Getu Beyene, Jude Aleu, John Odipio, Okao-Okuja Geoffrey, Raj Deepika Chauhan, Theresia Munga, Hannington Obiero, Mark Halsey, Muhammad Ilyas, Peter Raymond, Anton Bua, Nigel J. Taylor*, Douglas Miano and Titus Alicai * Correspondence: Nigel Taylor: Ntaylor@danforthcenter.org
Supplementary Table 2. Percent similairty (upper triangle) and percent divergence (lower triangle) of CBSV based on 0.9 kb nucleotide sequences from 3' end of the virus. Virus sequences obtained from samples collected from Kenya and Uganda in 2013 and 2014 and were compared with CBSV isoalte (CBSV-[TZ:Nal:07] GenBank: HG965221) used for making an inverted repeat construct in p5001.
	CBSV-[UG/13]LT560298	CBSV-[UG/13]LT560296	CBSV-[UG/13]LT560289	CBSV-[UG/13]LT560295	CBSV-[UG/13]LT560297	CBSV-[UG/13]LT560281	CBSV-[UG/13]LT560280	CBSV-[UG/13]LT560287	CBSV-[UG/13]LT560288	CBSV-[UG/13]LT560310	CBSV-[UG/13]LT560291	CBSV-[UG/13]LT560283	CBSV-[UG/13]LT560293	CBSV-[UG/13]LT560292	CBSV-[UG/13]LT560301	CBSV-[UG/13]LT560308	CBSV-[UG/13]LT560285	CBSV-[UG/13]LT560299	CBSV-[UG/13]LT560307	CBSV-[UG/13]LT560300	CBSV-[UG/13]LT560290	CBSV-[UG/13]LT560284	CBSV-[UG/13]LT560286	CBSV-[UG/13]LT560304	CBSV-[UG/13]LT560306	CBSV-[UG/13]LT560303	CBSV-[UG/13]LT560309	CBSV-[KE/14]LT560315	CBSV-[KE/14]LT560320	CBSV-[KE/14]LT560324	CBSV-[KE/14]LT560321	CBSV-[KE/14]LT560322	CBSV-[KE/14]LT560323	CBSV-[KE/14]LT560314	CBSV-[KE/14]LT560326	CBSV-[KE/14]LT560329	CBSV-[KE/14]LT560328	CBSV-[KE/14]LT560317	CBSV-[KE/14]LT560313	CBSV-[KE/14]LT560318	CBSV-[KE/14]LT560316	CBSV-[KE/14]LT560327	CBSV-[KE/14]LT560330	CBSV-[KE/14]LT560319	CBSV-[KE/14]LT560312	CBSV-[KE/14]LT560325	CBSV-[KE/14]LT560311	CBSV-[TZ/Nal/07]HG965221
CBSV-[UG/13]LT560298	***	98.8	98.3	98.8	98.8	98.4	98.4	98.4	98.3	98.4	97.3	97.6	97.6	97.1	97.1	97.9	97.7	97.9	97.9	97.2	97.6	97.7	97.7	97.6	97.6	97.2	94.7	94.8	91.9	92.1	92.2	92.1	92.1	93.2	92.5	92.6	92.8	92.7	92.8	92.8	92.7	92.6	92.6	92.1	92.2	92.2	92.2	92.1	CBSV-[UG/13]LT560298
CBSV-[UG/13]LT560296	0.9	***	99.1	99.6	99.6	99.2	99.2	99.2	99.1	99.2	97.9	98.1	98.1	97.7	97.7	98.7	98.4	98.4	98.4	97.8	98.1	98.2	98.2	98.1	98.1	97.8	95.2	95.3	90.9	91.1	91.2	91.1	91.1	93.8	91.5	91.6	91.8	91.7	91.8	91.8	91.7	91.6	91.6	91.1	91.2	91.2	91.2	91.7	CBSV-[UG/13]LT560296
CBSV-[UG/13]LT560289	1.4	0.4	***	99.6	99.6	99.9	99.7	99.9	99.8	99.9	98.3	98.6	98.6	98.1	98.1	99.1	98.7	98.9	98.9	98.2	98.6	98.7	98.7	98.6	98.6	98.2	95.7	95.8	91.6	91.8	91.9	91.8	91.8	94.1	91.8	91.9	92.1	92	92.1	91.9	92	91.9	91.9	91.5	91.6	91.6	91.6	92	CBSV-[UG/13]LT560289
CBSV-[UG/13]LT560295	0.9	0	0.4	***	100	99.7	99.7	99.7	99.6	99.7	98.3	98.6	98.6	98.1	98.1	99.1	98.7	98.9	98.9	98.2	98.6	98.7	98.7	98.6	98.6	98.2	95.7	95.8	91.3	91.6	91.7	91.6	91.6	94.1	91.8	91.9	92.1	92	92.1	92.1	92	91.9	91.9	91.5	91.6	91.6	91.6	92	CBSV-[UG/13]LT560295
CBSV-[UG/13]LT560297	0.9	0	0.4	0	***	99.7	99.7	99.7	99.6	99.7	98.3	98.6	98.6	98.1	98.1	99.1	98.7	98.9	98.9	98.2	98.6	98.7	98.7	98.6	98.6	98.2	95.7	95.8	91.3	91.6	91.7	91.6	91.6	94.1	91.8	91.9	92.1	92	92.1	92.1	92	91.9	91.9	91.5	91.6	91.6	91.6	92	CBSV-[UG/13]LT560297
CBSV-[UG/13]LT560281	1.2	0.3	0.1	0.3	0.3	***	99.8	100	99.9	100	98.4	98.7	98.7	98.2	98.2	99.2	98.8	99	99	98.3	98.7	98.8	98.8	98.7	98.7	98.3	95.8	95.9	91.5	91.7	91.8	91.7	91.7	94.2	91.9	92	92.2	92.1	92.2	92	92.1	92	92	91.6	91.7	91.7	91.7	92.1	CBSV-[UG/13]LT560281
CBSV-[UG/13]LT560280	1.2	0.3	0.3	0.3	0.3	0.2	***	99.8	99.7	99.8	98.4	98.7	98.7	98.2	98.2	99.4	98.8	99	99	98.3	98.7	98.8	98.8	98.7	98.7	98.3	95.8	95.9	91.5	91.7	91.8	91.7	91.7	94.2	91.9	92	92.2	92.1	92.2	92	92.1	92	92	91.6	91.7	91.7	91.7	92.1	CBSV-[UG/13]LT560280
CBSV-[UG/13]LT560287	1.2	0.3	0.1	0.3	0.3	0	0.2	***	99.9	100	98.4	98.7	98.7	98.2	98.2	99.2	98.8	99	99	98.3	98.7	98.8	98.8	98.7	98.7	98.3	95.8	95.9	91.5	91.7	91.8	91.7	91.7	94.2	91.9	92	92.2	92.1	92.2	92	92.1	92	92	91.6	91.7	91.7	91.7	92.1	CBSV-[UG/13]LT560287
CBSV-[UG/13]LT560288	1.4	0.4	0.2	0.4	0.4	0.1	0.3	0.1	***	99.9	98.3	98.6	98.6	98.1	98.1	99.1	98.7	98.9	98.9	98.2	98.6	98.7	98.7	98.6	98.6	98.2	95.7	95.8	91.3	91.6	91.7	91.6	91.6	94.1	91.8	91.9	92.1	92	92.1	91.9	92	91.9	91.9	91.5	91.6	91.6	91.6	92	CBSV-[UG/13]LT560288
CBSV-[UG/13]LT560310	1.2	0.3	0.1	0.3	0.3	0	0.2	0	0.1	***	98.4	98.7	98.7	98.2	98.2	99.2	98.8	99	99	98.3	98.7	98.8	98.8	98.7	98.7	98.3	95.8	95.9	91.5	91.7	91.8	91.7	91.7	94.2	91.9	92	92.2	92.1	92.2	92	92.1	92	92	91.6	91.7	91.7	91.7	92.1	CBSV-[UG/13]LT560310
CBSV-[UG/13]LT560291	2.4	1.7	1.7	1.7	1.7	1.6	1.6	1.6	1.7	1.6	***	99.8	99.8	99.3	98.9	98.6	98.9	99.2	99.2	99	99.3	99.4	99.4	99.3	99.3	99	95.6	95.4	91.5	91.5	91.6	91.7	91.5	94	91.7	91.8	92	91.9	92	91.8	91.9	91.8	91.8	91.5	91.5	91.5	91.5	91.5	CBSV-[UG/13]LT560291
CBSV-[UG/13]LT560283	2.2	1.5	1.5	1.5	1.5	1.3	1.3	1.3	1.5	1.3	0.2	***	100	99.6	99.1	98.8	99.1	99.4	99.4	99.2	99.6	99.7	99.7	99.6	99.6	99.2	95.6	95.7	91.5	91.7	91.8	91.7	91.7	94.2	91.9	92	92.2	92.1	92.2	92	92.1	92	92	91.6	91.7	91.7	91.7	91.7	CBSV-[UG/13]LT560283
CBSV-[UG/13]LT560293	2.2	1.5	1.5	1.5	1.5	1.3	1.3	1.3	1.5	1.3	0.2	0	***	99.6	99.1	98.8	99.1	99.4	99.4	99.2	99.6	99.7	99.7	99.6	99.6	99.2	95.6	95.7	91.5	91.7	91.8	91.7	91.7	94.2	91.9	92	92.2	92.1	92.2	92	92.1	92	92	91.6	91.7	91.7	91.7	91.7	CBSV-[UG/13]LT560293
CBSV-[UG/13]LT560292	2.6	1.9	1.9	1.9	1.9	1.8	1.8	1.8	1.9	1.8	0.7	0.4	0.4	***	98.7	98.3	98.7	99	99	99	99.1	99.2	99.2	99.1	99.1	98.8	95.1	95.2	91.1	91.2	91.3	91.2	91.2	93.8	91.5	91.6	91.8	91.7	91.8	91.6	91.7	91.6	91.6	91.1	91.2	91.2	91.2	91.5	CBSV-[UG/13]LT560292
CBSV-[UG/13]LT560301	2.6	1.9	1.9	1.9	1.9	1.8	1.8	1.8	1.9	1.8	1.1	0.9	0.9	1.3	***	98.3	98.7	99	99	99	99.1	99	99.4	99.3	99.3	99	95.1	95.2	91	91.2	91.3	91.2	91.2	93.8	91.5	91.6	91.8	91.7	91.8	91.6	91.7	91.6	91.6	91.1	91.2	91.2	91.5	91.5	CBSV-[UG/13]LT560301
CBSV-[UG/13]LT560308	1.8	0.9	0.9	0.9	0.9	0.8	0.6	0.8	0.9	0.8	1.5	1.2	1.2	1.7	1.7	***	98.8	99.1	99.3	98.7	98.8	98.9	98.9	98.8	98.8	98.4	95.7	95.8	91.6	91.8	91.9	91.8	91.8	94.3	92	92.1	92.3	92.2	92.3	92.1	92.2	92.1	92.1	91.7	91.8	91.8	91.8	92	CBSV-[UG/13]LT560308
CBSV-[UG/13]LT560285	1.7	1	1	1	1	0.9	0.9	0.9	1	0.9	0.8	0.6	0.6	1	1	0.9	***	99.4	99.4	98.8	99.1	99.4	99.2	99.1	99.1	98.8	95.7	95.8	91.5	91.7	91.8	91.7	91.7	94.2	91.9	92	92.2	92.1	92.2	92	92.1	92	92	91.6	91.7	91.7	91.7	91.8	CBSV-[UG/13]LT560285
CBSV-[UG/13]LT560299	1.8	1.1	1.1	1.1	1.1	1	1	1	1.1	1	0.8	0.6	0.6	1	1	0.9	0.2	***	99.8	99.1	99.4	99.6	99.6	99.4	99.4	99.1	95.9	96	91.8	92	92.1	92	92	94.6	92.2	92.3	92.6	92.5	92.6	92.3	92.5	92.3	92.3	91.9	92	92	92	92	CBSV-[UG/13]LT560299
CBSV-[UG/13]LT560307	1.8	1.1	1.1	1.1	1.1	1	1	1	1.1	1	0.8	0.6	0.6	1	1	0.7	0.2	0.2	***	99.3	99.4	99.6	99.6	99.4	99.4	99.1	96.1	96.2	92	92.2	92.3	92.2	92.2	94.8	92.5	92.6	92.8	92.7	92.8	92.6	92.7	92.6	92.6	92.1	92.2	92.2	92.2	92.2	CBSV-[UG/13]LT560307
CBSV-[UG/13]LT560300	2.5	1.8	1.8	1.8	1.8	1.7	1.7	1.7	1.8	1.7	1	0.8	0.8	1	1	1.3	0.9	0.9	0.7	***	99.2	99.1	99.6	99.7	99.7	99.3	95.6	95.7	91.6	91.8	91.9	91.8	91.8	94.3	92	92.1	92.3	92.2	92.3	92.1	92.2	92.1	92.1	91.7	91.8	91.8	92	91.8	CBSV-[UG/13]LT560300
CBSV-[UG/13]LT560290	2.2	1.5	1.5	1.5	1.5	1.3	1.3	1.3	1.5	1.3	0.7	0.4	0.4	0.9	0.9	1.2	0.6	0.6	0.6	0.8	***	99.4	99.7	99.6	99.6	99.2	95.6	95.7	91.5	91.7	91.8	91.7	91.7	94.2	91.9	92	92.2	92.1	92.2	92	92.1	92	92	91.6	91.7	91.7	91.7	91.7	CBSV-[UG/13]LT560290
CBSV-[UG/13]LT560284	2	1.4	1.3	1.3	1.3	1.2	1.2	1.2	1.3	1.2	0.6	0.3	0.3	0.8	1	1.1	0.2	0.4	0.4	0.9	0.6	***	99.6	99.4	99.4	99.1	95.7	95.8	91.6	91.8	91.9	91.8	91.8	94.3	92	92.1	92.3	92.2	92.3	92.1	92.2	92.1	92.1	91.7	91.8	91.8	91.8	91.8	CBSV-[UG/13]LT560284
CBSV-[UG/13]LT560286	2	1.4	1.3	1.3	1.3	1.2	1.2	1.2	1.3	1.2	0.6	0.3	0.3	0.8	0.6	1.1	0.4	0.4	0.4	0.4	0.3	0.4	***	99.9	99.9	99.6	95.7	95.8	91.6	91.8	91.9	91.8	91.8	94.3	92	92.1	92.3	92.2	92.3	92.1	92.2	92.1	92.1	91.7	91.8	91.8	92	91.8	CBSV-[UG/13]LT560286
CBSV-[UG/13]LT560304	2.2	1.5	1.5	1.5	1.5	1.3	1.3	1.3	1.5	1.3	0.7	0.4	0.4	0.9	0.7	1.2	0.6	0.6	0.6	0.3	0.4	0.6	0.1	***	100	99.7	95.6	95.7	91.5	91.7	91.8	91.7	91.7	94.2	91.9	92	92.2	92.1	92.2	92	92.1	92	92	91.6	91.7	91.7	91.9	91.7	CBSV-[UG/13]LT560304
CBSV-[UG/13]LT560306	2.2	1.5	1.5	1.5	1.5	1.3	1.3	1.3	1.5	1.3	0.7	0.4	0.4	0.9	0.7	1.2	0.6	0.6	0.6	0.3	0.4	0.6	0.1	0	***	99.7	95.6	95.7	91.5	91.7	91.8	91.7	91.7	94.2	91.9	92	92.2	92.1	92.2	92	92.1	92	92	91.6	91.7	91.7	91.9	91.7	CBSV-[UG/13]LT560306
CBSV-[UG/13]LT560303	2.2	1.5	1.5	1.5	1.5	1.4	1.4	1.4	1.5	1.4	0.7	0.4	0.4	0.9	0.7	1.2	0.6	0.6	0.6	0.3	0.4	0.6	0.1	0	0	***	95.2	95.3	91.1	91.3	91.5	91.3	91.3	93.9	91.6	91.7	91.9	91.9	92	91.8	91.9	91.7	91.7	91.2	91.3	91.3	91.6	91.3	CBSV-[UG/13]LT560303
CBSV-[UG/13]LT560309	5.2	4.5	4.5	4.5	4.5	4.4	4.4	4.4	4.5	4.4	4.6	4.6	4.6	5.1	5.1	4.5	4.2	4.3	4	4.6	4.6	4.5	4.5	4.6	4.6	4.6	***	99.9	92	92	92.1	92.2	92	95.3	92.3	92.7	92.7	92.6	92.7	92.7	92.6	92.5	92.5	92.3	92.3	92.3	92.3	92.6	CBSV-[UG/13]LT560309
CBSV-[KE/14]LT560315	5.1	4.4	4.4	4.4	4.4	4.3	4.3	4.3	4.4	4.3	4.7	4.5	4.5	5	5	4.4	4	4.1	3.9	4.5	4.5	4.4	4.4	4.5	4.5	4.5	0.1	***	91.9	92.1	92.2	92.1	92.1	95.4	92.5	92.8	92.8	92.7	92.8	92.8	92.7	92.6	92.6	92.3	92.5	92.5	92.5	92.7	CBSV-[KE/14]LT560315
CBSV-[KE/14]LT560320	8.4	9.5	9.1	9.4	9.4	9.3	9.3	9.3	9.4	9.3	9.3	9.3	9.3	9.7	9.8	9.1	8.9	8.9	8.6	9.1	9.3	9.1	9.1	9.3	9.3	9.3	8.6	8.8	***	99.6	99.7	99.8	99.6	93.5	94.9	94.8	94.7	94.7	94.6	94.3	94.7	95	95	94.2	94.5	94.5	94.5	92.1	CBSV-[KE/14]LT560320
CBSV-[KE/14]LT560324	8.2	9.2	8.9	9.2	9.2	9	9	9	9.2	9	9.3	9	9	9.6	9.6	8.9	8.7	8.6	8.4	8.9	9	8.9	8.9	9	9	9.1	8.6	8.5	0.4	***	99.9	99.8	100	93.7	95.1	95	94.9	94.9	94.8	94.6	94.9	95.2	95.2	94.3	94.7	94.7	94.7	92.3	CBSV-[KE/14]LT560324
CBSV-[KE/14]LT560321	8	9.1	8.8	9	9	8.9	8.9	8.9	9	8.9	9.2	8.9	8.9	9.4	9.4	8.8	8.5	8.5	8.2	8.8	8.9	8.8	8.8	8.9	8.9	8.9	8.5	8.4	0.3	0.1	***	99.9	99.9	93.8	95.2	95.1	95	95	94.9	94.7	95	95.3	95.3	94.5	94.8	94.8	94.8	92.5	CBSV-[KE/14]LT560321
CBSV-[KE/14]LT560322	8.2	9.2	8.9	9.2	9.2	9	9	9	9.2	9	9	9	9	9.6	9.6	8.9	8.7	8.6	8.4	8.9	9	8.9	8.9	9	9	9.1	8.4	8.5	0.2	0.2	0.1	***	99.8	93.7	95.1	95	94.9	94.9	94.8	94.6	94.9	95.2	95.2	94.5	94.7	94.7	94.7	92.3	CBSV-[KE/14]LT560322
CBSV-[KE/14]LT560323	8.2	9.2	8.9	9.2	9.2	9	9	9	9.2	9	9.3	9	9	9.6	9.6	8.9	8.7	8.6	8.4	8.9	9	8.9	8.9	9	9	9.1	8.6	8.5	0.4	0	0.1	0.2	***	93.7	95.1	95	94.9	94.9	94.8	94.6	94.9	95.2	95.2	94.3	94.7	94.7	94.7	92.3	CBSV-[KE/14]LT560323
CBSV-[KE/14]LT560314	6.8	6.1	6.2	6.2	6.2	6.1	6.1	6.1	6.2	6.1	6.3	6.1	6.1	6.6	6.6	6	5.7	5.7	5.5	6	6.1	6	6	6.1	6.1	6.1	4.9	4.7	7	6.7	6.6	6.7	6.7	***	97	96.9	96.7	96.8	96.9	96.7	96.8	97.1	97	96.2	96.6	96.6	96.6	93.1	CBSV-[KE/14]LT560314
CBSV-[KE/14]LT560326	7.8	8.8	8.9	8.9	8.9	8.7	8.7	8.7	8.9	8.7	9	8.7	8.7	9.3	9.3	8.6	8.4	8.4	8.1	8.6	8.7	8.6	8.6	8.7	8.7	8.8	8.2	8.1	5.3	5.1	5	5.1	5.1	3.1	***	99.2	99.2	99.3	99.2	99	99.3	99.9	99.8	98.8	99.1	99.1	99.1	93.6	CBSV-[KE/14]LT560326
CBSV-[KE/14]LT560329	7.6	8.7	8.7	8.7	8.7	8.6	8.6	8.6	8.7	8.6	8.9	8.6	8.6	9.1	9.1	8.5	8.3	8.2	8	8.5	8.6	8.5	8.5	8.6	8.6	8.6	7.9	7.7	5.5	5.2	5.1	5.2	5.2	3.2	0.8	***	99.1	99.2	99.1	98.9	99.2	99.3	99.2	98.9	99.2	99.2	99.2	94.1	CBSV-[KE/14]LT560329
CBSV-[KE/14]LT560328	7.4	8.4	8.5	8.5	8.5	8.3	8.3	8.3	8.5	8.3	8.6	8.3	8.3	8.9	8.9	8.2	8	8	7.7	8.2	8.3	8.2	8.2	8.3	8.3	8.4	7.8	7.7	5.6	5.3	5.2	5.3	5.3	3.4	0.8	0.9	***	99.4	99.3	99.1	99.4	99.3	99.2	98.9	99	99	99	93.7	CBSV-[KE/14]LT560328
CBSV-[KE/14]LT560317	7.5	8.5	8.6	8.6	8.6	8.5	8.5	8.5	8.6	8.5	8.7	8.5	8.5	9	9	8.3	8.1	8.1	7.8	8.3	8.5	8.3	8.3	8.5	8.5	8.4	8	7.8	5.6	5.3	5.2	5.3	5.3	3.3	0.7	0.8	0.6	***	99.7	99.4	99.8	99.4	99.3	99	99.1	99.1	99.1	93.8	CBSV-[KE/14]LT560317
CBSV-[KE/14]LT560313	7.4	8.4	8.5	8.5	8.5	8.3	8.3	8.3	8.5	8.3	8.6	8.3	8.3	8.9	8.9	8.2	8	7.9	7.7	8.2	8.3	8.2	8.2	8.3	8.3	8.2	7.8	7.7	5.7	5.5	5.3	5.5	5.5	3.2	0.8	0.9	0.7	0.3	***	99.6	99.7	99.3	99.2	98.9	99	99	99	93.9	CBSV-[KE/14]LT560313
CBSV-[KE/14]LT560318	7.4	8.4	8.7	8.5	8.5	8.6	8.6	8.6	8.7	8.6	8.9	8.6	8.6	9.1	9.1	8.5	8.2	8.2	7.9	8.5	8.6	8.5	8.5	8.6	8.6	8.5	7.8	7.7	6	5.7	5.6	5.7	5.7	3.4	1	1.1	0.9	0.6	0.4	***	99.4	99.1	99	98.7	98.8	98.8	98.8	93.7	CBSV-[KE/14]LT560318
CBSV-[KE/14]LT560316	7.5	8.5	8.6	8.6	8.6	8.5	8.5	8.5	8.6	8.5	8.7	8.5	8.5	9	9	8.3	8.1	8.1	7.8	8.3	8.5	8.3	8.3	8.5	8.5	8.4	8	7.8	5.6	5.3	5.2	5.3	5.3	3.3	0.7	0.8	0.6	0.2	0.3	0.6	***	99.4	99.3	99	99.1	99.1	99.1	93.8	CBSV-[KE/14]LT560316
CBSV-[KE/14]LT560327	7.6	8.7	8.7	8.7	8.7	8.6	8.6	8.6	8.7	8.6	8.9	8.6	8.6	9.1	9.1	8.5	8.3	8.2	8	8.5	8.6	8.5	8.5	8.6	8.6	8.6	8.1	8	5.2	5	4.9	5	5	3	0.1	0.7	0.7	0.6	0.7	0.9	0.6	***	99.9	98.9	99.2	99.2	99.2	93.7	CBSV-[KE/14]LT560327
CBSV-[KE/14]LT560330	7.6	8.6	8.7	8.7	8.7	8.6	8.6	8.6	8.7	8.6	8.9	8.6	8.6	9.1	9.1	8.5	8.2	8.2	8	8.5	8.6	8.5	8.5	8.6	8.6	8.6	8.1	8	5.2	5	4.9	5	5	3.1	0.2	0.8	0.8	0.7	0.8	1	0.7	0.1	***	98.8	99.1	99.1	99.1	93.6	CBSV-[KE/14]LT560330
CBSV-[KE/14]LT560319	8.1	9.2	9.3	9.3	9.3	9.1	9.1	9.1	9.3	9.1	9.3	9.1	9.1	9.7	9.7	9	8.8	8.7	8.5	9	9.1	9	9	9.1	9.1	9.2	8.2	8.2	6.1	6	5.8	5.8	6	3.9	1.2	1.1	1.1	1	1.1	1.3	1	1.1	1.2	***	99.2	99.2	99.2	93.7	CBSV-[KE/14]LT560319
CBSV-[KE/14]LT560312	8	9	9.1	9.1	9.1	9	9	9	9.1	9	9.3	9	9	9.5	9.5	8.9	8.6	8.6	8.4	8.9	9	8.9	8.9	9	9	9	8.2	8.1	5.8	5.6	5.5	5.6	5.6	3.6	0.9	0.8	1	0.9	1	1.2	0.9	0.8	0.9	0.8	***	99.8	99.8	93.8	CBSV-[KE/14]LT560312
CBSV-[KE/14]LT560325	8	9	9.1	9.1	9.1	9	9	9	9.1	9	9.3	9	9	9.5	9.5	8.9	8.6	8.6	8.4	8.9	9	8.9	8.9	9	9	9	8.2	8.1	5.8	5.6	5.5	5.6	5.6	3.6	0.9	0.8	1	0.9	1	1.2	0.9	0.8	0.9	0.8	0.2	***	99.8	93.8	CBSV-[KE/14]LT560325
CBSV-[KE/14]LT560311	8	9	9.1	9.1	9.1	9	9	9	9.1	9	9.3	9	9	9.5	9.3	8.9	8.6	8.6	8.4	8.6	9	8.9	8.6	8.7	8.7	8.8	8.2	8.1	5.8	5.6	5.5	5.6	5.6	3.6	0.9	0.8	1	0.9	1	1.2	0.9	0.8	0.9	0.8	0.2	0.2	***	93.8	CBSV-[KE/14]LT560311
CBSV-[TZ/Nal/07]HG965221	8.1	8.5	8.6	8.6	8.6	8.5	8.5	8.5	8.6	8.5	9.3	9	9	9.3	9.3	8.6	8.5	8.6	8.4	8.9	9	8.9	8.9	9	9	9	8	7.8	8.5	8.2	8.1	8.2	8.2	7.3	6.8	6.2	6.7	6.6	6.4	6.7	6.6	6.7	6.8	6.7	6.6	6.6	6.6	***	CBSV-[TZ/Nal/07]HG965221
	CBSV-[UG/13]LT560298	CBSV-[UG/13]LT560296	CBSV-[UG/13]LT560289	CBSV-[UG/13]LT560295	CBSV-[UG/13]LT560297	CBSV-[UG/13]LT560281	CBSV-[UG/13]LT560280	CBSV-[UG/13]LT560287	CBSV-[UG/13]LT560288	CBSV-[UG/13]LT560310	CBSV-[UG/13]LT560291	CBSV-[UG/13]LT560283	CBSV-[UG/13]LT560293	CBSV-[UG/13]LT560292	CBSV-[UG/13]LT560301	CBSV-[UG/13]LT560308	CBSV-[UG/13]LT560285	CBSV-[UG/13]LT560299	CBSV-[UG/13]LT560307	CBSV-[UG/13]LT560300	CBSV-[UG/13]LT560290	CBSV-[UG/13]LT560284	CBSV-[UG/13]LT560286	CBSV-[UG/13]LT560304	CBSV-[UG/13]LT560306	CBSV-[UG/13]LT560303	CBSV-[UG/13]LT560309	CBSV-[KE/14]LT560315	CBSV-[KE/14]LT560320	CBSV-[KE/14]LT560324	CBSV-[KE/14]LT560321	CBSV-[KE/14]LT560322	CBSV-[KE/14]LT560323	CBSV-[KE/14]LT560314	CBSV-[KE/14]LT560326	CBSV-[KE/14]LT560329	CBSV-[KE/14]LT560328	CBSV-[KE/14]LT560317	CBSV-[KE/14]LT560313	CBSV-[KE/14]LT560318	CBSV-[KE/14]LT560316	CBSV-[KE/14]LT560327	CBSV-[KE/14]LT560330	CBSV-[KE/14]LT560319	CBSV-[KE/14]LT560312	CBSV-[KE/14]LT560325	CBSV-[KE/14]LT560311	CBSV-[TZ/Nal/07]HG965221
